# Supplementary material for: Assessment of the skin barrier function in the reconstructed human epidermis using a multimodal approach at molecular, tissue and functional levels
Source: Royal Society of Chemistry journal article supplement (doi:10.1039/d1an00465d), 2021-01-01
Supplement: d1an00465d2.pdf [file d1an00465d2.pdf]

| Retention time | Peak intensity | Abundance | Retention time | Abundance |
|----------------|----------------|-----------|----------------|-----------|
| 1.00           | 100            | 100       | 1.00           | 100       |
| 1.05           | 100            | 100       | 1.05           | 100       |
| 1.10           | 100            | 100       | 1.10           | 100       |
| 1.15           | 100            | 100       | 1.15           | 100       |
| 1.20           | 100            | 100       | 1.20           | 100       |
| 1.25           | 100            | 100       | 1.25           | 100       |
| 1.30           | 100            | 100       | 1.30           | 100       |
| 1.35           | 100            | 100       | 1.35           | 100       |
| 1.40           | 100            | 100       | 1.40           | 100       |
| 1.45           | 100            | 100       | 1.45           | 100       |
| 1.50           | 100            | 100       | 1.50           | 100       |
| 1.55           | 100            | 100       | 1.55           | 100       |
| 1.60           | 100            | 100       | 1.60           | 100       |
| 1.65           | 100            | 100       | 1.65           | 100       |
| 1.70           | 100            | 100       | 1.70           | 100       |
| 1.75           | 100            | 100       | 1.75           | 100       |
| 1.80           | 100            | 100       | 1.80           | 100       |
| 1.85           | 100            | 100       | 1.85           | 100       |
| 1.90           | 100            | 100       | 1.90           | 100       |
| 1.95           | 100            | 100       | 1.95           | 100       |
| 2.00           | 100            | 100       | 2.00           | 100       |

Table S1: List of the peaks of caffeine, paracetamol, chlorpheniramine and fentanyl chromatograms analysis. The peak retention time and the abundance of caffeine, paracetamol, chlorpheniramine and fentanyl are indicated. The abundance of caffeine, paracetamol, chlorpheniramine and fentanyl is 100% and the abundance of caffeine, paracetamol, chlorpheniramine and fentanyl is 100%.
