# Supplementary material for: Assessment of the skin barrier function in the reconstructed human epidermis using a multimodal approach at molecular, tissue and functional levels
Source: Royal Society of Chemistry journal article supplement (doi:10.1039/d1an00465d), 2021-01-01
Supplement: d1an00465d3.pdf [file d1an00465d3.pdf]

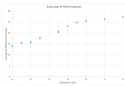

Evolution of IRR thickness (nm) by successive deposition cycles based on the measured average thickness.
